# Supplementary material for: Effect of polymer charge on the formation and stability of anti-inflammatory drug loaded nanostructured lipid carriers: physicochemical approach
Source: Royal Society of Chemistry journal article supplement (doi:10.1039/c5ra11066a), 2015-01-01
Supplement: c5ra11066a1.pdf [file c5ra11066a1.pdf]

**Table S1.** Release kinetics of DNa and IMC from NLCs in the absence and presence of polymers at 25 °C.

| Drug | Polymer | Higuchi      |        | Korsmeyer-peppas |        | Weibull |        |
|------|---------|--------------|--------|------------------|--------|---------|--------|
|      |         | $k_H/h^{-1}$ | $R^2$  | n                | $R^2$  | $\beta$ | $R^2$  |
| DNa  | Nil     | 8.711        | 0.9539 | 0.832            | 0.9784 | 1.408   | 0.9943 |
|      | PEG     | 10.48        | 0.9837 | 0.601            | 0.9865 | 1.203   | 0.9992 |
|      | NaCMC   | 9.15         | 0.9828 | 0.578            | 0.9848 | 1.002   | 0.9972 |
|      | LM200   | 6.09         | 0.9547 | 0.934            | 0.9908 | 1.265   | 0.9967 |
| IMC  | Nil     | 5.614        | 0.9969 | 0.569            | 0.9981 | 0.728   | 0.9983 |
|      | PEG     | 5.358        | 0.9902 | 0.407            | 0.9928 | 0.591   | 0.9940 |
|      | NaCMC   | 5.535        | 0.9986 | 0.440            | 0.9996 | 0.607   | 0.9995 |
|      | LM200   | 5.007        | 0.9982 | 0.512            | 0.9983 | 0.661   | 0.9992 |

Concentration of NLCs: 1 mM, polymer: 0.01 wt% and drug: 0.2 mM

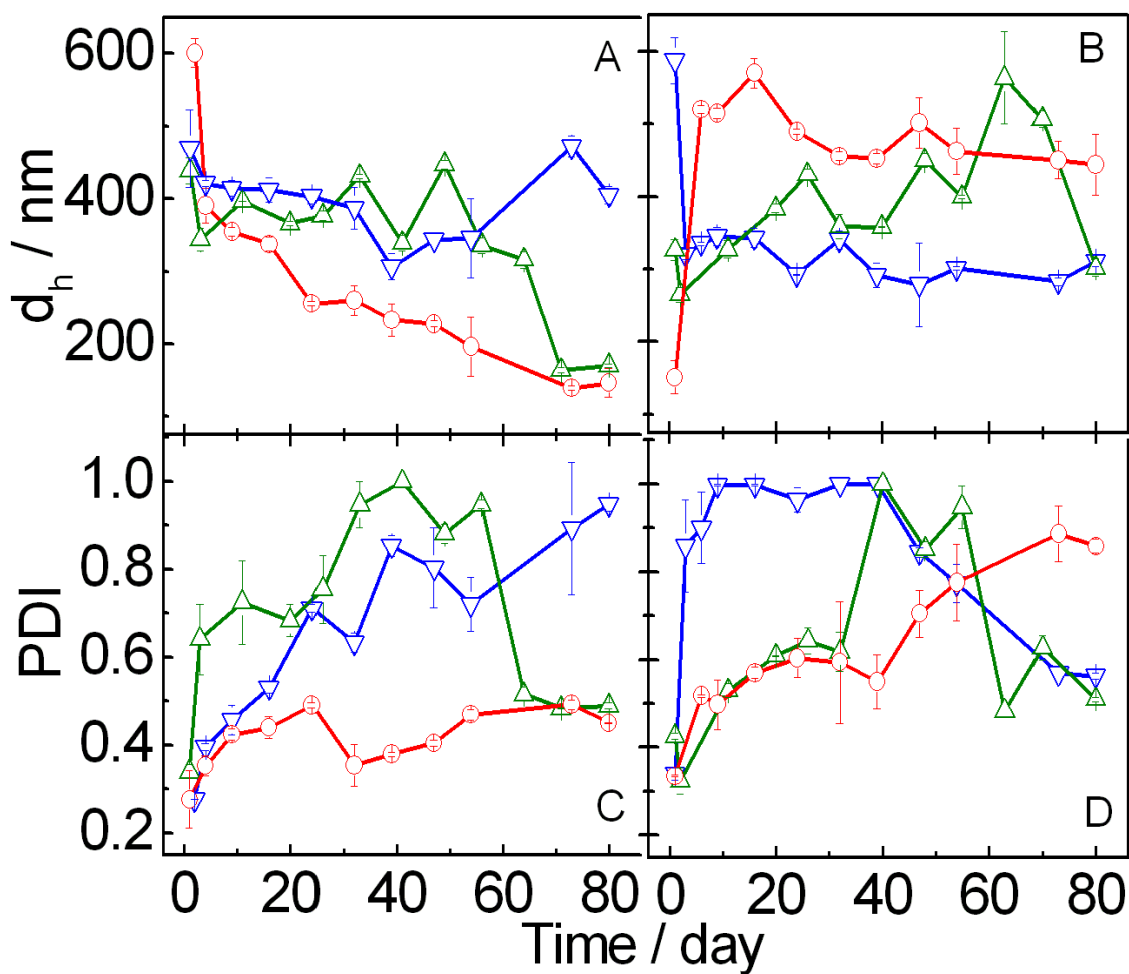

**Figure S1.** Variation in size (A, B) and polydispersity index (PDI), (C,D) of NLC (SLC+TS+PA, 2:2:1 M/M/M, 1mM) with time at 25 °C. [Polymer] : A, C, 0.001wt% and B, D, 0.1wt%. Polymers used: □, No polymer; ○, PEG; Δ, NaCMC and ▽, LM200. Temperature, 25°C.

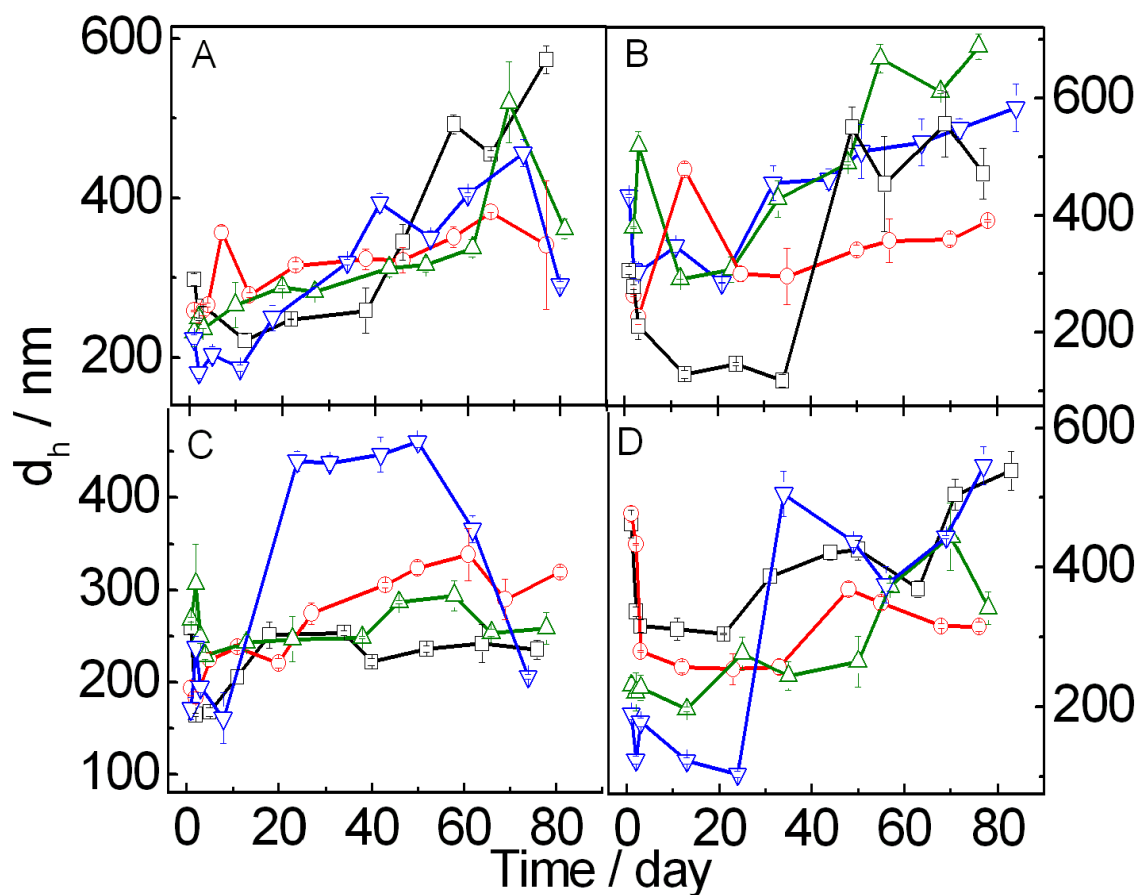

**Figure S2.** Hydrodynamic diameter ( $d_h$ ) vs time profile for DNA (A,C) and IMC (B,D) loaded NLC (SLC+TS+PA, 2:2:1 M/M/M, 1mM) stabilized by aqueous Tween 60 (10mM)+0.01 wt% polymer solution. [Drug]/mM :A, B, 0.1; C, D, 0.3mM. Polymers used:  $\square$ , No polymer;  $\circ$ , PEG;  $\triangle$ , NaCMC and  $\nabla$ , LM200. Temperature, 25°C

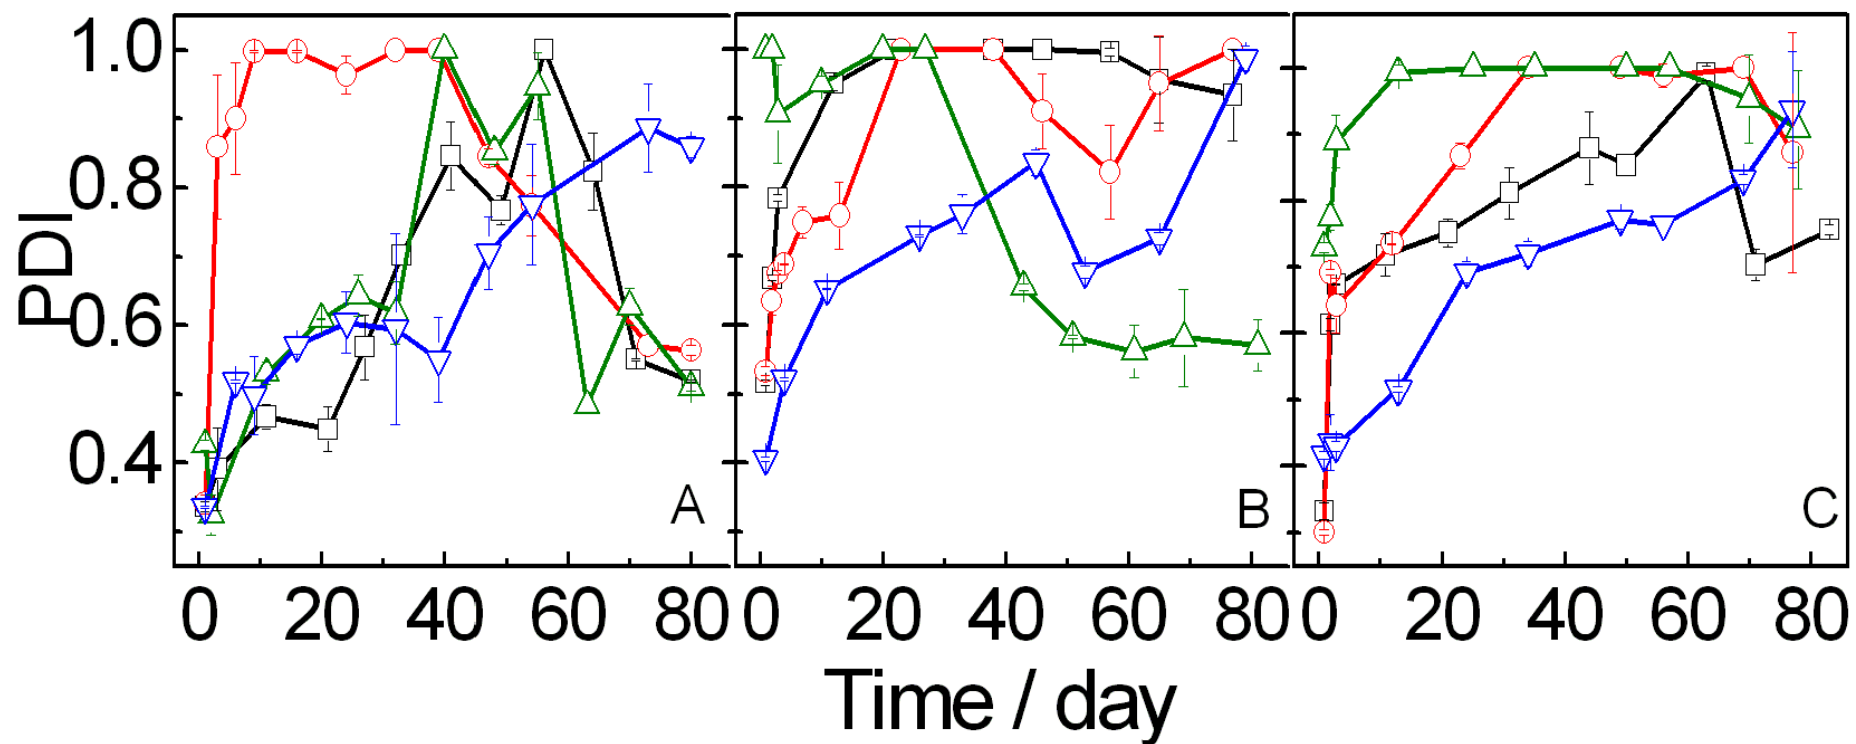

**Figure S3.** Variation in polydispersity index (PDI) of drug free and drug loaded NLC (SLC+TS+PA, 2:2:1 M/M/M, 1 mM) with time at 25 °C. Formulations were stabilized by aqueous Tween 60 (10mM)+0.01 wt% polymer solution. Panel A: drug free NLC; panel B: 0.2mM DNA loaded NLC; panel C: 0.2mM IMC loaded NLC. Polymers: □, no polymer; ○, PEG; △, NaCMC and ▽, LM200.

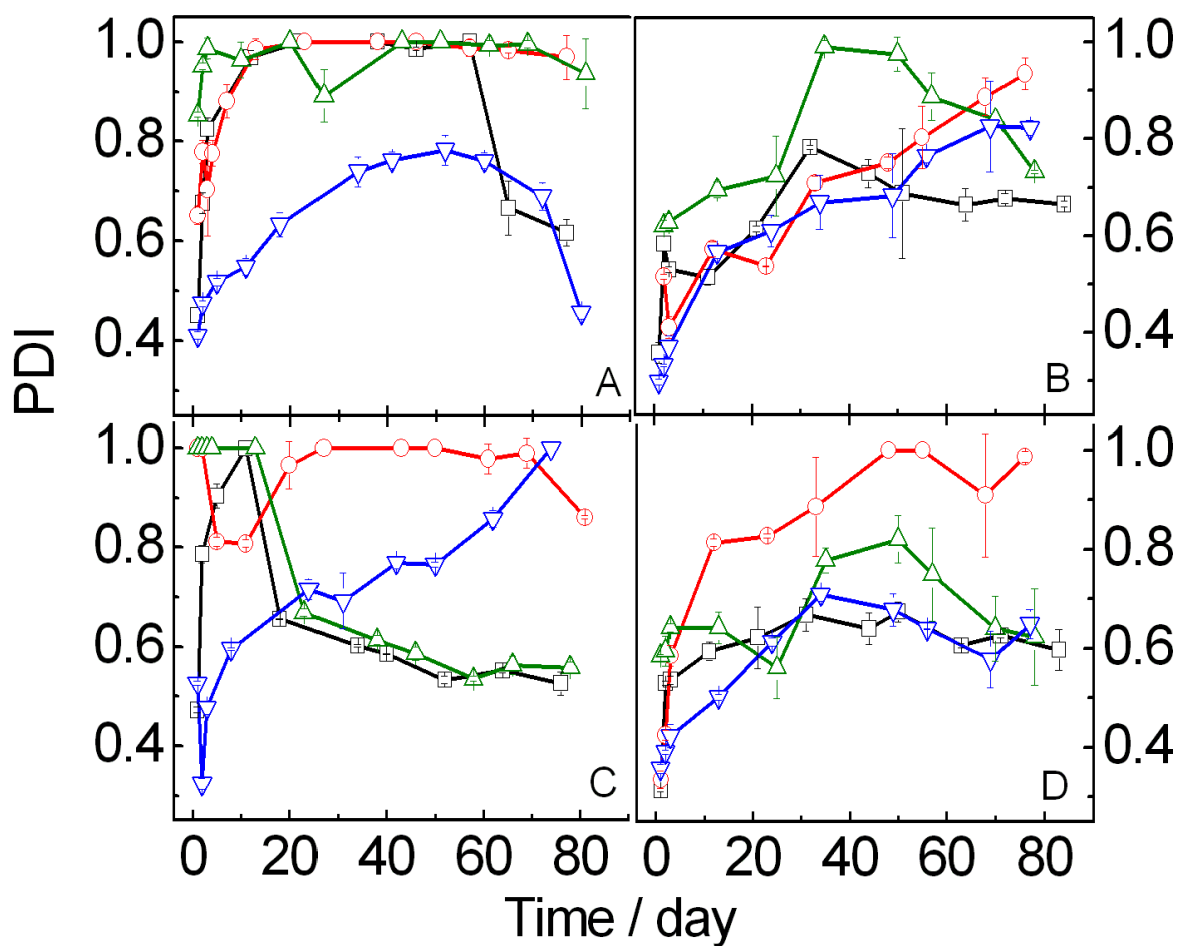

**Figure S4.** Variation in polydispersity index (PDI) of DNA (A,C) and IMC (B,D) loaded NLC (SLC+TS+PA, 2:2:1 M/M/M, 1 mM) stabilized by aqueous Tween 60 (10mM)+ 0.01 wt% polymer solution. [Drug]: A, B, 0.1 mM; C, D, 0.3 mM. Polymers used: □, No polymer; ○, PEG; △, NaCMC and ▽, LM200. Temperature, 25°C.

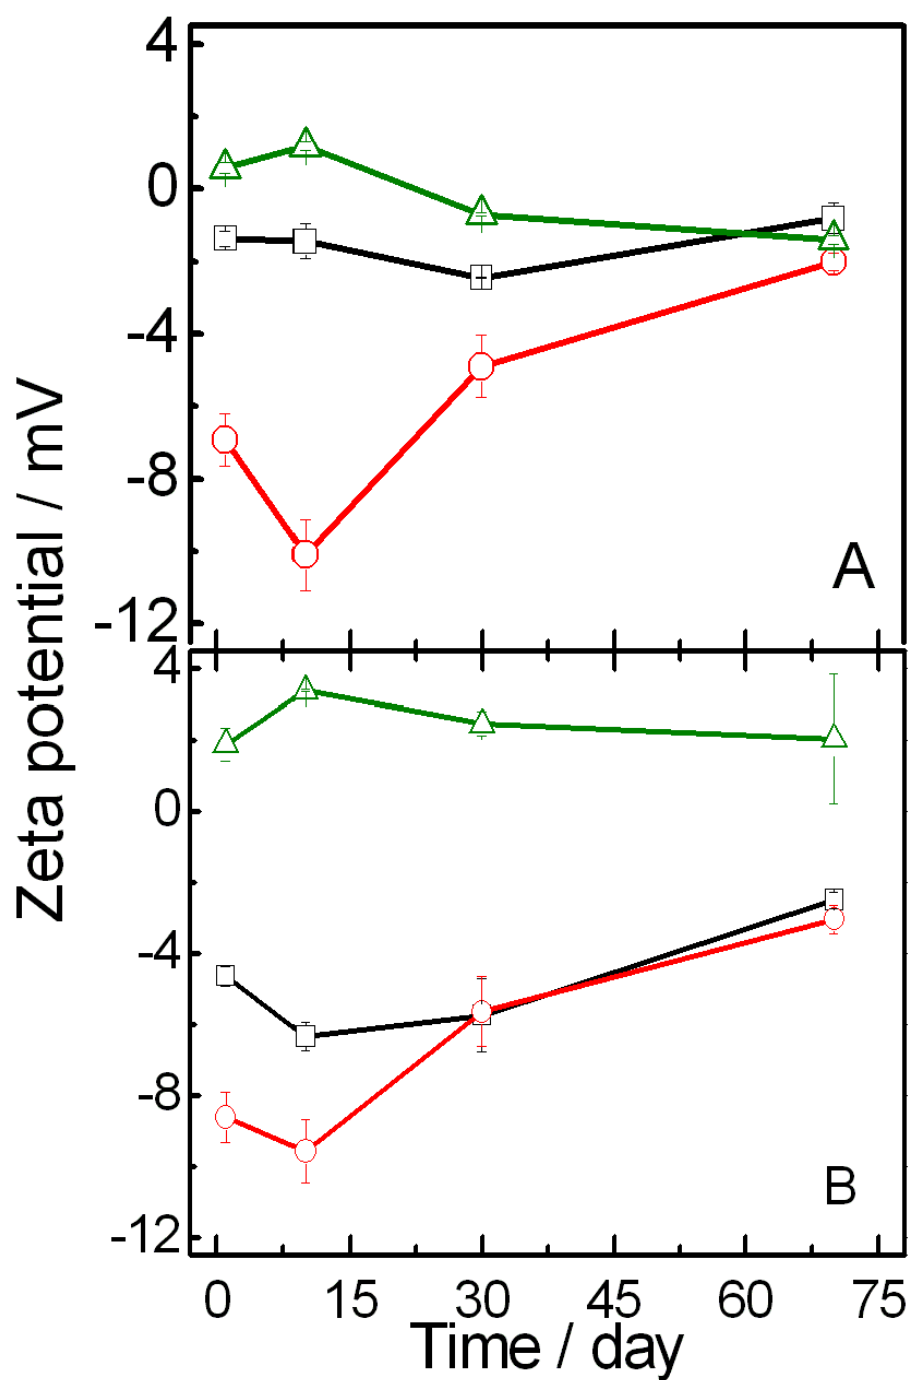

**Figure S5.** Variation in zeta potential of NLC (SLC+TS+PA, 2:2:1 M/M/M, 1mM) with time, stabilized by aqueous Tween 60 (10mM) + polymer solution. [Polymer]/wt%: 0.001(A) and 0.1(B). Systems:  $\square$ , PEG;  $\circ$ , NaCMC- and  $\triangle$ , LM200. Temperature, 25 °C.

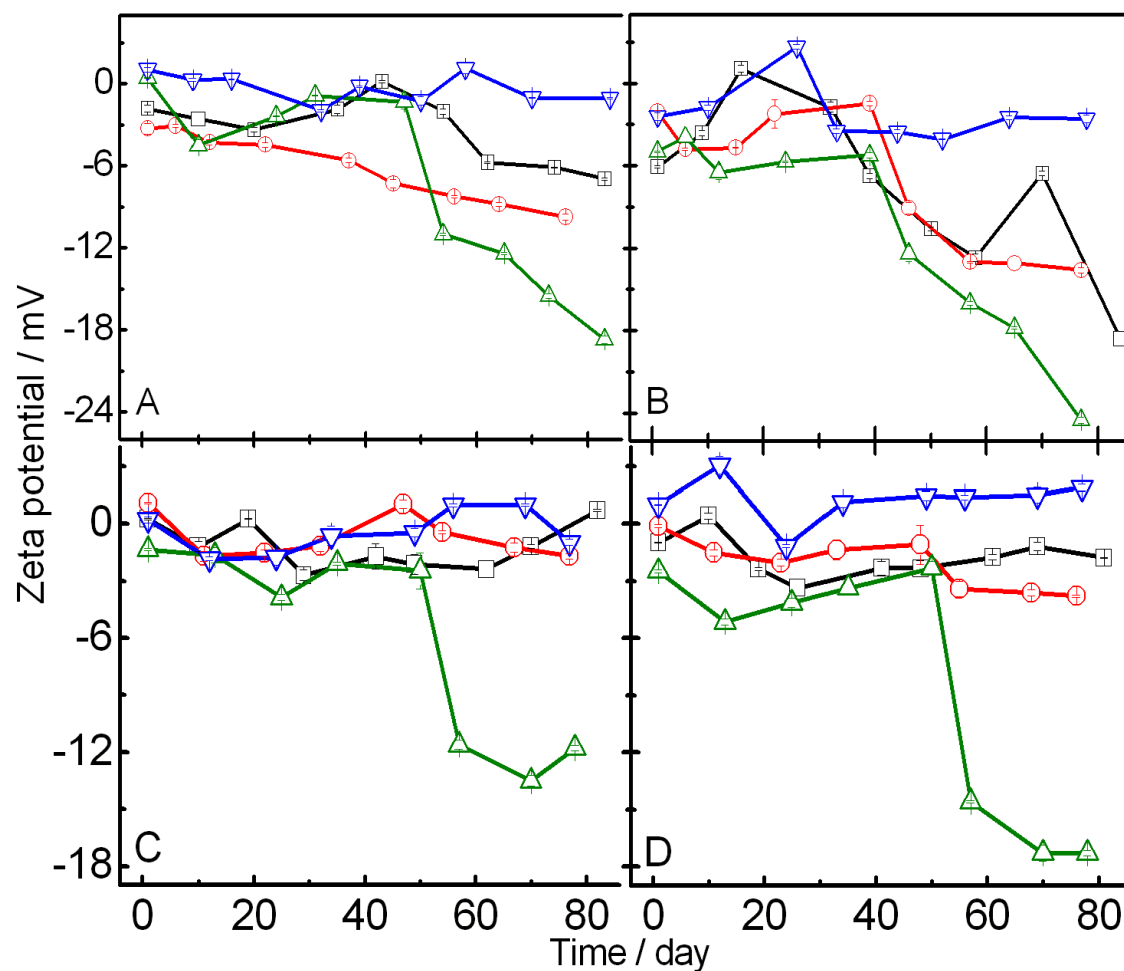

**Figure S6.** Zeta potential vs time profile for DNA (A,C) and IMC (B,D) loaded NLC (SLC+TS+PA, 2:2:1 M/M/M, 1 mM) stabilized by aqueous Tween 60 (10mM)+ 0.01 wt% polymer solution. [Drug]: A, B, 0.1 mM; C, D, 0.3 mM. Polymers used:  $\square$ , No polymer;  $\circ$ , PEG;  $\triangle$ , NaCMC and  $\nabla$ , LM200. Temperature, 25 °C.

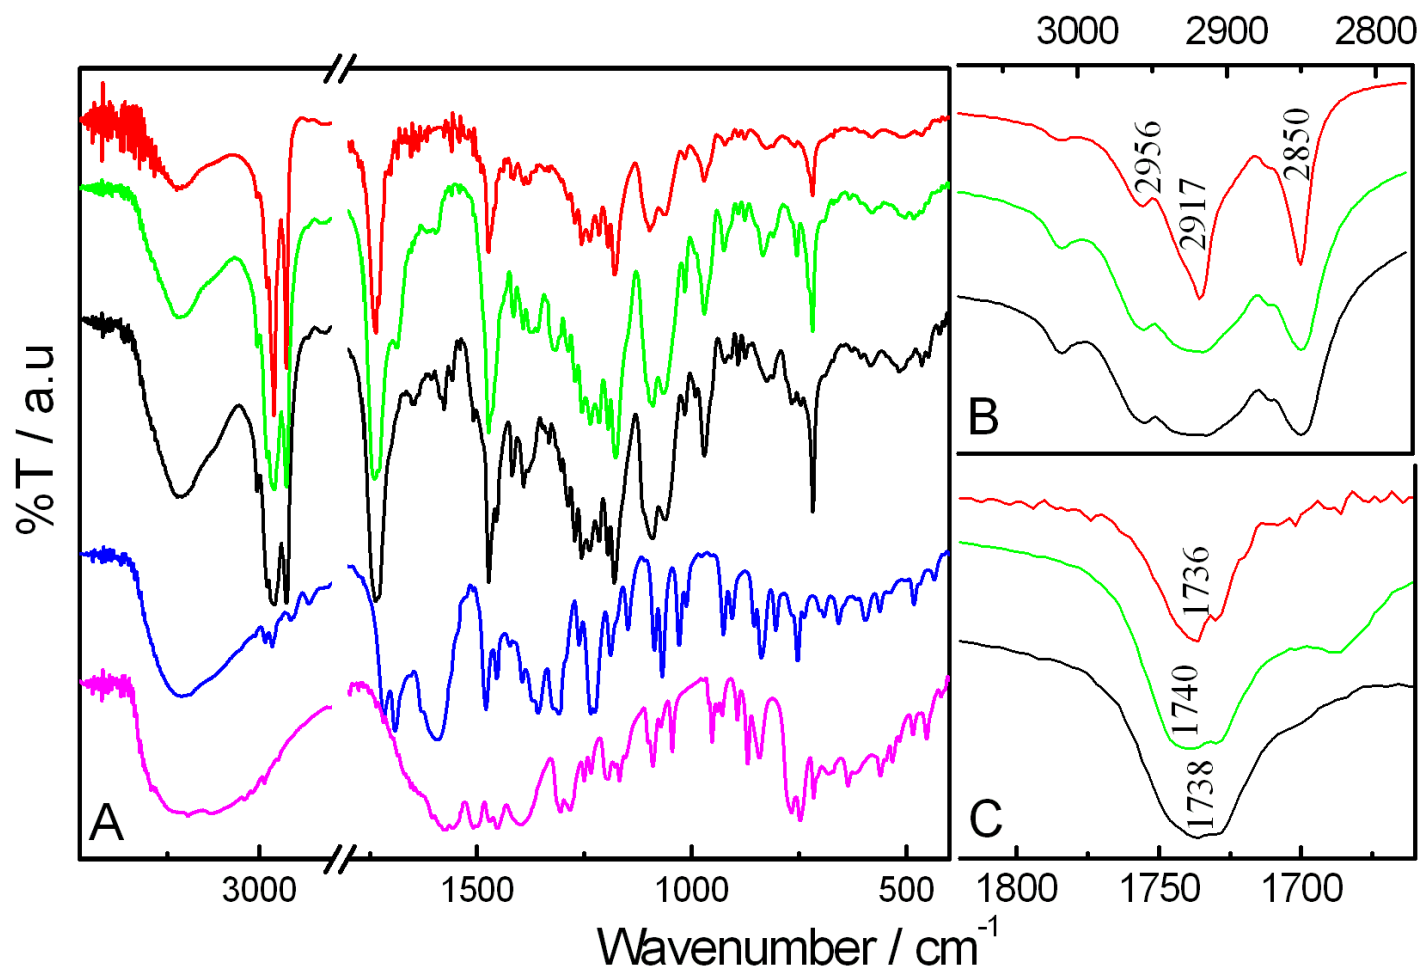

**Figure S7.** Effect of DNA and IMC on the FT-IR spectra of lipid mixture (SLC+TS+PA, 2:2:1 M/M/M). Systems: —, lipid mixture (LM); —, MC+LM; —, DNA+LM; —, IMC and —, DNA. Panel A describes the entire spectra; panel B shows the symmetric and antisymmetric stretching vibration of the CH<sub>2</sub> groups, panel C represents the vibration of the carbonyl (C=O) groups.



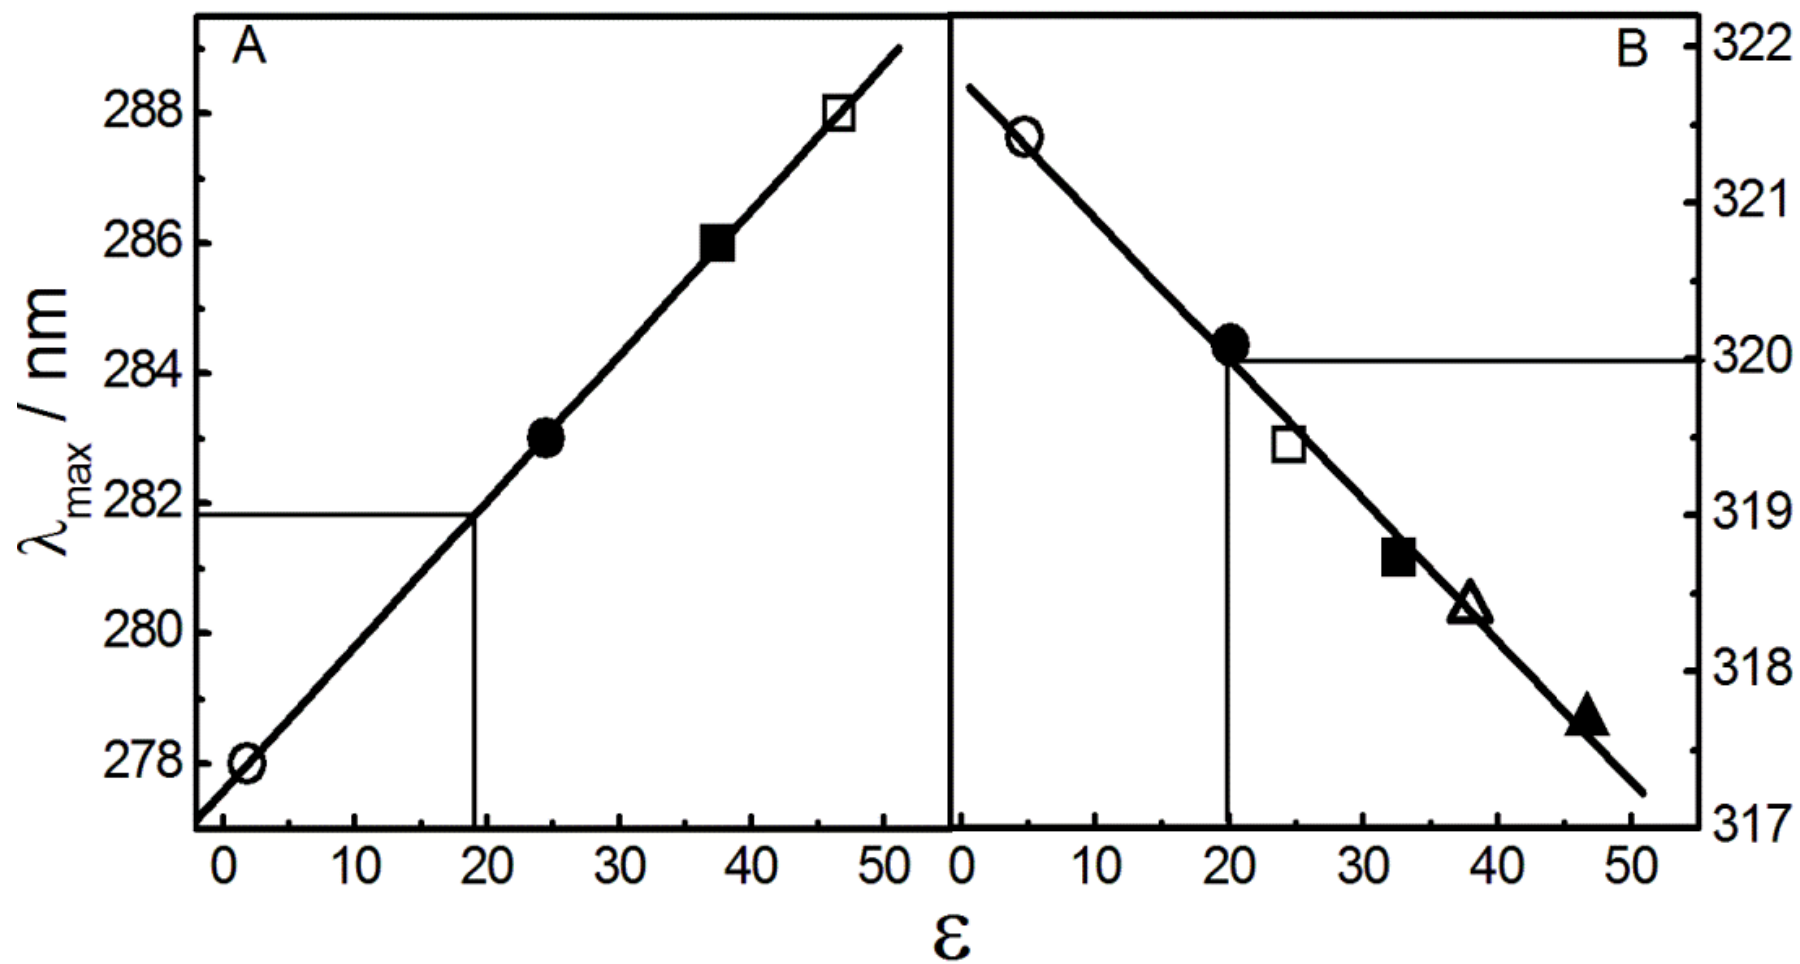

**Figure S8.** Dependence of absorption maxima ( $\lambda_{\max}$ ) of DNA (A) and IMC (B) on the dielectric constant ( $\epsilon$ ) of the medium at 25 °C. Solvents: panel A:  $\square$ , DMSO;  $\blacksquare$ , acetonitrile;  $\bullet$ , ethanol;  $\circ$ , hexane; panel B:  $\square$ , methanol;  $\blacksquare$ , ethanol;  $\bullet$ , propanol;  $\circ$ , chloroform;  $\Delta$ , DMF and  $\blacktriangle$ , DMSO. [Drug]: 0.2 mM.
